# Supplementary material for: BNT162b2 mRNA SARS-CoV-2 Vaccine Elicits High Avidity and Neutralizing Antibodies in Healthcare Workers
Source: MDPI journal article supplement (doi:10.3390/vaccines9060672), 2021-06-18
Supplement: s1 [file s1]

### Correlation Anti-S/RBD Euroimmune vs anti-RBD HM

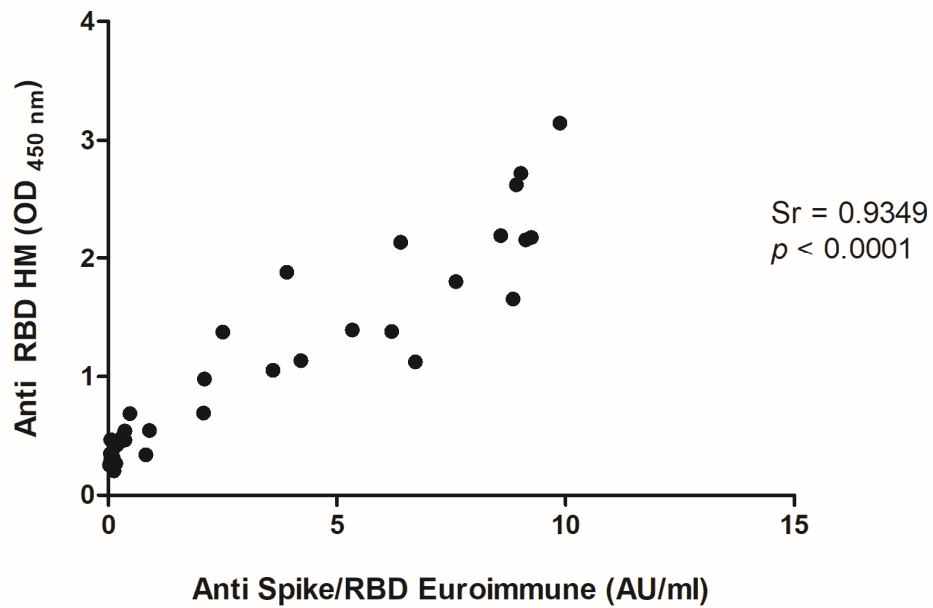

**Figure S1.** Correlation between Anti Spike/RBD IgG Euroimmune and anti-RBD IgG home made. The levels of anti-Spike/RBD IgG detected with a commercial assay and of anti-RBD IgG evaluated in house are reported respectively on x- and y- axis. Spearman rank correlation coefficient and *p*-value are reported.

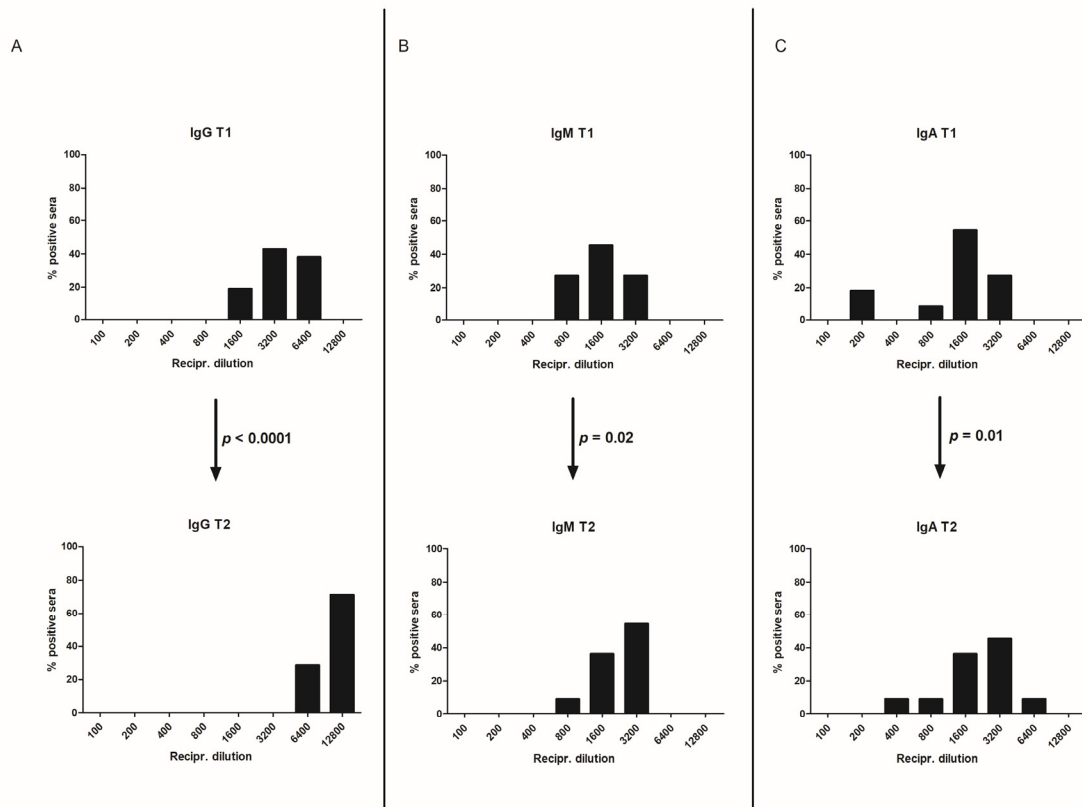

**Figure S2.** End point dilution assays of Anti-RBD IgG (A), IgM (B), and IgA (C). Antibody titers were also evaluated by means of endpoint dilution: IgG titers show a highly significative increase from T1 to T2 (A), whereas IgM and IgA undergo a minor (albeit present) increase (B, C).
